# Supplementary material for: Pleckstrin-2 is essential for erythropoiesis in β-thalassemic mice, reducing apoptosis and enhancing enucleation
Source: PubMed Central journal article supplement (PMC8093212; doi:10.1038/s42003-021-02046-9), 2021-05-03
Supplement: 42003_2021_2046_MOESM4_ESM.pdf [file 42003_2021_2046_MOESM4_ESM.pdf]

## Description of Additional Supplementary Files

**File name:** Supplementary Data 1

**Description:** Source Data for all Main and Supplementary Figures.
